# Supplementary material for: Genomic Analysis of a Marine Bacterium: Bioinformatics for Comparison, Evaluation, and Interpretation of DNA Sequences
Source: Biomed Res Int. 2016 Nov 1;2016:7215379. doi: 10.1155/2016/7215379 (PMC5108866; doi:10.1155/2016/7215379)
Supplement: Supplementary file 1 — The supplementary file contains GGDC results are supplied with this paper. It shows DNA-DNA Hybridisation (DDH) data. [file 7215379.f1.zip]

Archive with 10 entries (10 files):
- ggdc_results_16-10-01-10-46-2949682.csv
- ggdc_results_16-10-01-10-46-4936506.csv
- ggdc_results_16-10-01-10-47-0249624.csv
- ggdc_results_16-10-01-10-47-1646884.csv
- ggdc_results_16-10-01-10-47-2546884.csv
- check_file (1).txt
- check_file (2).txt
- check_file (3).txt
- check_file (4).txt
- check_file.txt
