# Supplementary material for: Genomic Analysis of a Marine Bacterium: Bioinformatics for Comparison, Evaluation, and Interpretation of DNA Sequences
Source: Biomed Res Int. 2016 Nov 1;2016:7215379. doi: 10.1155/2016/7215379 (PMC5108866; doi:10.1155/2016/7215379)
Supplement: Supplementary file 1 — The supplementary file contains GGDC results are supplied with this paper. It shows DNA-DNA Hybridisation (DDH) data. [file 7215379.f1.zip › check_file (1).txt]

--- 
About: >
  This file (in computer-readable YAML format) lists all genome parts
  used in your GGDC run. Use it to verify that the GGDC results are 
  based on the correct data. This is not trivial as genome parts might be
  duplicated or missing from uploaded FASTA files, and wrong GenBank
  accession might have been chosen.
---
- name: targetGenome
  parts:
  - name: gi|94442944|emb|AM260710.1| Marine bacterium SJ-BF7 partial 16S rRNA gene,
      strain SJ-BF7
    base-pairs: 1502
    percent-GC: 52.99600532623169
  total:
    base-pairs: 1502
    percent-GC: 52.99600532623169
- name: refGenome1
  parts:
  - name: gi|38812|emb|X67024.1| A.haloplanktis 16S rRNA sequence
    base-pairs: 1457
    percent-GC: 53.05422100205902
  total:
    base-pairs: 1457
    percent-GC: 53.05422100205902
