# Supplementary material for: Genomic Analysis of a Marine Bacterium: Bioinformatics for Comparison, Evaluation, and Interpretation of DNA Sequences
Source: Biomed Res Int. 2016 Nov 1;2016:7215379. doi: 10.1155/2016/7215379 (PMC5108866; doi:10.1155/2016/7215379)
Supplement: Supplementary file 1 — The supplementary file contains GGDC results are supplied with this paper. It shows DNA-DNA Hybridisation (DDH) data. [file 7215379.f1.zip › ggdc_results_16-10-01-10-46-4936506.csv]

		Formula 1					Formula 2					Formula 3					G+C difference
Query genome	Reference genome	DDH	Model C.I.	Bootstrap C.I.	Distance	Prob. DDH >= 70%	DDH	Model C.I.	Bootstrap C.I.	Distance	Prob. DDH >= 70%	DDH	Model C.I.	Bootstrap C.I.	Distance	Prob. DDH >= 70%
Marine_bacterium_SJ_BF5_AM260711	Pseudoalteromonas_haloplanktis	0	[%]		-9999.0000		0	[%]		-9999.0000		0	[%]		-9999.0000		0.78
